# Supplementary material for: Mental health and psychosocial support programmes for adults in humanitarian emergencies: a systematic review and meta-analysis in low and middle-income countries
Source: PubMed Central journal article supplement — BMJ Glob Health. 2019 Oct 1;4(5):e001484. doi: 10.1136/bmjgh-2019-001484 (PMC6782047; doi:10.1136/bmjgh-2019-001484), 2019-10-01
Supplement: bmjgh-2019-001484supp002.pdf [file bmjgh-2019-001484supp002.pdf]

## Appendix B: Summary of evidence assessment framework

| Categories of evidence | Criteria                                                                                                                                                                                                                                 | Rationale                                                                                                                                                             |
|------------------------|------------------------------------------------------------------------------------------------------------------------------------------------------------------------------------------------------------------------------------------|-----------------------------------------------------------------------------------------------------------------------------------------------------------------------|
| Strong+++              | a) At least five studies with low or moderate overall risk of bias<br>AND<br>b) Findings from evidence available are considered to be consistent                                                                                         | - Findings are reliable based on a large number of good quality studies<br>- Overall, the conclusions are drawn from credible and reliable evidence                   |
| Moderate++             | a) At least five studies with low or moderate risk of bias but inconsistent in their findings<br>OR<br>b) two to four studies with low or moderate risk of bias and the findings from evidence available are considered to be consistent | - Findings are based on more than one good quality studies<br>-Overall, the conclusions are drawn from credible and reliable evidence but there are some deficiencies |
| Limited +              | a) Two to four studies with low or moderate risk of bias and the findings from evidence available are considered to be inconsistent<br>OR<br>c) A single study from low risk of bias                                                     | -Findings are reliable but unconfirmed<br>-Consistency of the findings across a body of evidence cannot be determined.                                                |
| Insufficient -         | a) A single study from medium or high risk of bias study<br>OR<br>b) Evidence only available from high risk of bias studies                                                                                                              | -Overall conclusions cannot be drawn                                                                                                                                  |
