# Supplementary material for: Mental health and psychosocial support programmes for adults in humanitarian emergencies: a systematic review and meta-analysis in low and middle-income countries
Source: PubMed Central journal article supplement — BMJ Glob Health. 2019 Oct 1;4(5):e001484. doi: 10.1136/bmjgh-2019-001484 (PMC6782047; doi:10.1136/bmjgh-2019-001484), 2019-10-01
Supplement: bmjgh-2019-001484supp003.pdf [file bmjgh-2019-001484supp003.pdf]

Appendix C: Description of 35 studies evaluating MHPSS programmes for adults

| Study          | Setting                       | Population                                                                                                 | Format and duration                                         | Intervention    | Control   | Follow ups                   | Study design | Overall risk of bias | Outcomes                                                                                                                                                                    |
|----------------|-------------------------------|------------------------------------------------------------------------------------------------------------|-------------------------------------------------------------|-----------------|-----------|------------------------------|--------------|----------------------|-----------------------------------------------------------------------------------------------------------------------------------------------------------------------------|
| Acartuk (2015) | Turkey<br>Armed conflict      | Syrian refugees: Women 75.86%<br>Sample size: n=29<br>INT: n=15 (m =35.27 y)<br>CON: n= 4 (m= 37.92 y)     | 7 sessions, 90 mins; Individual                             | PST-EMDR        | Wait-list | Post (7 weeks)               | RCT          | Low                  | <ul style="list-style-type: none"> <li>• PTSD</li> <li>• Depression</li> </ul>                                                                                              |
| Ayoughi (2012) | Afghanistan<br>Armed conflict | Help seeking Afghan women<br>Sample size: n= 61<br>INT: n= 31 (m= 31.2 y)<br>CON: n= 30 (m=35.3 y)         | 5, 45-60 mins sessions for 5 weeks; Individual              | PST-Counselling | TAU       | 3 months                     | Quasi RCT    | High                 | <ul style="list-style-type: none"> <li>• Depression</li> <li>• Anxiety</li> <li>• Coping</li> </ul>                                                                         |
| Bagoglu (2007) | Turkey<br>Earthquakes in 1999 | Earthquake survivors; mean age = 34 y:<br>Women 87%<br>Sample size: n =31<br>INT: n= 16<br>CON: n =15      | 1 session, on average 31 mins (range 9-70 mins); Individual | CBT             | Wait-list | Post at 1 month and 2 months | RCT          | High                 | <ul style="list-style-type: none"> <li>• PTSD</li> <li>• Depression</li> <li>• Fear and avoidance</li> <li>• Functional impairment</li> </ul>                               |
| Basoglu (2005) | Turkey<br>Earthquake in 1999  | Earthquake survivors; mean age = 36.3 y;<br>Women 84.7%<br>Sample size: n=59<br>INT: n = 31<br>CON: n = 28 | 1, 60 min session; Individual                               | CBT             | Wait-list | Post                         | RCT          | High                 | <ul style="list-style-type: none"> <li>• PTSD</li> <li>• Depression</li> <li>• Emotional problems</li> <li>• Fear and avoidance</li> <li>• Functional impairment</li> </ul> |

| Study           | Setting                     | Population                                                                                           | Format and duration                                                             | Intervention                      | Control            | Follow ups                       | Study design  | Overall risk of bias | Outcomes                                                                                                                                                                                       |
|-----------------|-----------------------------|------------------------------------------------------------------------------------------------------|---------------------------------------------------------------------------------|-----------------------------------|--------------------|----------------------------------|---------------|----------------------|------------------------------------------------------------------------------------------------------------------------------------------------------------------------------------------------|
| Bass (2012)     | Indonesia<br>Armed conflict | Conflict-affected adults;<br>Women 57.7%<br>Sample size: n=333<br>INT: n=158<br>CON: n=175           | Weekly, for total of 8 weeks;<br>Group                                          | PST-Counselling                   | No intervention    | Post 3 months follow-up          | Non random    | High                 | <ul style="list-style-type: none"> <li>• Common MH problems</li> <li>• Depression</li> <li>• Anxiety</li> <li>• Somatic problems</li> <li>• Functional Impairment</li> <li>• Coping</li> </ul> |
| Bass (2013)     | Congo<br>Armed conflict     | Women<br>Sample size: n =405<br>INT: n= 157 (m= 36.9 y)<br>CON: n= 248 (m = 33.8 y)                  | 1, 1 hr individual session and 11, 2-hr group sessions;<br>Individual and Group | CBT-Cognitive Proccession Therapy | Individual support | Post (one month) and at 6 months | Clustered RCT | High                 | <ul style="list-style-type: none"> <li>• PTSD</li> <li>• Emotional problems</li> <li>• Functional impairment</li> </ul>                                                                        |
| Bass (2016)     | Northern Iraq<br>Torture    | Trauma Adults;<br>Women 33.3%<br>Sample size: n=207<br>INT: n=157 (m=40.3 y)<br>CON: n=50 (m=40.8 y) | 6-12 sessions (6 minimum);<br>Individual                                        | PST-Counselling                   | Wait-list          | 1 month                          | RCT           | Low                  | <ul style="list-style-type: none"> <li>• PTSD</li> <li>• Functional Impairment</li> <li>• Depression</li> <li>• Anxiety</li> <li>• Grief</li> </ul>                                            |
| Becker (2009)   | India<br>Tsunami            | Women tsunami survivors;<br>Sample size: n=200<br>INT: n=100<br>CON: n=100                           | Group                                                                           | PST- Psychosocial Care            | No intervention    | Post                             | Non random    | High                 | <ul style="list-style-type: none"> <li>• PTSD</li> </ul>                                                                                                                                       |
| Bichescu (2007) | Romania                     | Former political detainees; Female 5%                                                                | 4-5, 2 hr sessions, weekly                                                      | NET                               | Psychoeducation    | 6 months                         | Quasi RCT     | High                 | <ul style="list-style-type: none"> <li>• PTSD</li> </ul>                                                                                                                                       |

| Study           | Setting                 | Population                                                                                                               | Format and duration                                     | Intervention                                          | Control   | Follow ups                               | Study design | Overall risk of bias | Outcomes                                                                                                                                                                              |
|-----------------|-------------------------|--------------------------------------------------------------------------------------------------------------------------|---------------------------------------------------------|-------------------------------------------------------|-----------|------------------------------------------|--------------|----------------------|---------------------------------------------------------------------------------------------------------------------------------------------------------------------------------------|
|                 | Political violence      | Sample size: n =18<br>INT: n= 9 (m=68.9 y)<br>CON: n= 9 (m=69.8 y)                                                       | for 10 weeks;<br>Individual                             |                                                       |           |                                          |              |                      | <ul style="list-style-type: none"> <li>• Depression</li> </ul>                                                                                                                        |
| Bolton (2014)   | Thailand Refugee        | Burmese refugees in Thailand;<br>Women 63%<br>Sample size: n =347<br>INT: n = 182 (m =26.5 y)<br>CON: n= 165 (m =34.3 y) | Weekly, 1- hr session for 9 sessions;<br>Individual     | CBT-Trans-diagnostic<br>Community-based mental health | Wait-list | Post                                     | RCT          | High                 | <ul style="list-style-type: none"> <li>• PTSD</li> <li>• Depression</li> <li>• Anxiety</li> <li>• Functional Impairment</li> <li>• Conduct problems</li> <li>• Alcohol use</li> </ul> |
| Bryant (2011)   | Thailand Terrorist      | Terrorist attack survivors<br>Women 96%<br>Sample size: N=28<br>INT: n = 16 (m =42.3 y)<br>CON: n =12 (m =43.9 y)        | 8, 1hr session, weekly;<br>Individual                   | CBT                                                   | TAU       | Post (one month), 3 months, and 6 months | RCT          | Low                  | <ul style="list-style-type: none"> <li>• PTSD</li> <li>• Depression</li> <li>• Grief</li> </ul>                                                                                       |
| Connolly (2011) | Rwanda Genocide in 1994 | Survivors; mean age =38.14 y; Women more than 80%<br>Sample size: n =145<br>INT: n= 71<br>CON: n= 74                     | Mean duration is 49 mins, single session;<br>Individual | PST-Thought Field Therapy                             | Wait-list | Post (one week) and two years            | Quasi RCT    | High                 | <ul style="list-style-type: none"> <li>• PTSD</li> <li>• Depression</li> <li>• Anxiety</li> <li>• Fear and avoidance</li> <li>• Anger</li> </ul>                                      |
| Descilo (2010)  | South-east Asia         | Tsunami survivors;<br>Women 87.4%                                                                                        | Yoga: 4x 2hr sessions; Group                            | PST-Yoga only and Yoga with                           | Wait-list | 6 weeks and 24 weeks                     | Non random   | High                 | <ul style="list-style-type: none"> <li>• PTSD</li> <li>• Depression</li> </ul>                                                                                                        |

| Study         | Setting                              | Population                                                                                                     | Format and duration                                | Intervention                    | Control          | Follow ups                    | Study design | Overall risk of bias | Outcomes                                                                                                           |
|---------------|--------------------------------------|----------------------------------------------------------------------------------------------------------------|----------------------------------------------------|---------------------------------|------------------|-------------------------------|--------------|----------------------|--------------------------------------------------------------------------------------------------------------------|
|               | Tsunami in 2004                      | Sample size: n=183<br>INT (Yoga): n=60<br>INT (Yoga+ET): n=60<br>CON: n=63                                     | Exposure therapy: 3-5x 1hr sessions;<br>Individual | exposure therapy                |                  |                               |              |                      | <ul style="list-style-type: none"> <li>Quality of life</li> </ul>                                                  |
| Esala (2017)  | Cambodia<br>Torture                  | Victims of torture;<br>Women 75%<br>Sample size: n=88<br>INT: n=45 (m=60.0 y)<br>CON: n=43 (m=60.7 y)          | 5 days; Individual                                 | NET                             | Wait-list        | Post 3 month and 4-6 month    | RCT          | Low                  | <ul style="list-style-type: none"> <li>PTSD</li> <li>Depression</li> <li>Anxiety</li> </ul>                        |
| Hagl (2015)   | Bosnia Herzegovina<br>Armed conflict | Women whose husbands were killed or missing; mean age= 38.6 y<br>Sample size: n= 119<br>INT: n=60<br>CON: n=59 | 7, weekly, 2 hr, sessions over 8 weeks; Group      | CBT-Dialogical exposure therapy | Supportive group | Post and 12 months            | Quasi RCT    | High                 | <ul style="list-style-type: none"> <li>PTSD</li> <li>Common MH problems</li> <li>Grief</li> </ul>                  |
| Hewage (2018) | Timor-Leste<br>Armed conflict        | War-affected adults;<br>Women 37.2%<br>Sample size: n=78<br>INT: n=39 (m=29.9 y)<br>CON: n=39 (m=30.2 y)       | 7x 120 minute sessions across 4 weeks; Individual  | CBT                             | Wait-list        | Post and one month            | RCT          | Moderate             | <ul style="list-style-type: none"> <li>PTSD</li> <li>Anger/Irritability</li> <li>Psychological Distress</li> </ul> |
| Igreja (2004) | Mozambique<br>Armed conflict         | Adults; mean age = 40.2 y; Women 44%<br>Sample size: n = 206<br>INT: n= 66                                     | 1, 1hr, session; Individual                        | NET                             | No intervention  | Post (2 months) and 11 months | Quasi RCT    | High                 | <ul style="list-style-type: none"> <li>PTSD</li> <li>Common MH problems</li> </ul>                                 |

| Study | Setting | Population                          | Format and duration | Intervention | Control | Follow ups | Study design | Overall risk of bias | Outcomes                                                             |
|-------|---------|-------------------------------------|---------------------|--------------|---------|------------|--------------|----------------------|----------------------------------------------------------------------|
|       |         | CON: n= 71<br>NON Case group: n =69 |                     |              |         |            |              |                      | <ul style="list-style-type: none"><li>• Somatic complaints</li></ul> |

| Study          | Setting                 | Population                                                                                                                                                                               | Format and duration                              | Intervention | Control   | Follow ups             | Study design | Overall risk of bias | Outcomes                                                                                                                                                                                |
|----------------|-------------------------|------------------------------------------------------------------------------------------------------------------------------------------------------------------------------------------|--------------------------------------------------|--------------|-----------|------------------------|--------------|----------------------|-----------------------------------------------------------------------------------------------------------------------------------------------------------------------------------------|
| Jacob (2014)   | Rwanda Genocide in 1994 | Widowed and orphaned, Female 92.1%<br>Sample size: n=76<br>INT: n = 38 (Widows n =21 m =48.29 y; Orphans n= 17 m = 25,06)<br>CON: n= 36 (widow n =22, m = 46.86 y; Orphan n =16 m = 24y) | 8, 90-150 mins, weekly; Individual               | NET          | Wait-list | 3 months and 12 months | RCT          | Low                  | <ul style="list-style-type: none"> <li>• PTSD</li> </ul>                                                                                                                                |
| Jiang (2014)   | China Earthquake 2008   | Earthquake survivors Women 71.4%<br>Sample size: n= 49<br>INT: n= 27 (m = 24.79 y)<br>CON: n = 22 (m = 36.05y)                                                                           | 12, 1 hr weekly for 12 weeks; Individual         | PST-IPT      | TAU       | 3 months and 6 months  | RCT          | Moderate             | <ul style="list-style-type: none"> <li>• PTSD</li> <li>• Depression</li> <li>• Anger</li> <li>• Functional impairment</li> <li>• Partner violence</li> <li>• Quality of life</li> </ul> |
| Meffert (2014) | Egypt Genocide          | Sudanese refugees; mean age=31 y; Women 81%<br>Sample size: n=22<br>INT: n = 13<br>CON: n = 9;                                                                                           | 6 sessions, twice a week for 3 weeks; Individual | PST-IPT      | Wait-list | Post                   | RCT          | Moderate             | <ul style="list-style-type: none"> <li>• PTSD</li> <li>• Depression</li> <li>• Anger</li> <li>• Partner violence</li> </ul>                                                             |

| Study                  | Setting                        | Population                                                                                                                                                            | Format and duration                                          | Intervention                           | Control         | Follow ups                   | Study design | Overall risk of bias | Outcomes                                                                                                                        |
|------------------------|--------------------------------|-----------------------------------------------------------------------------------------------------------------------------------------------------------------------|--------------------------------------------------------------|----------------------------------------|-----------------|------------------------------|--------------|----------------------|---------------------------------------------------------------------------------------------------------------------------------|
| Mughal (2015)          | Sierra Leone<br>Armed conflict | Victims of war;<br>Women 33.1%<br>Sample size: n=98<br>INT: n=48 (m=34.5 y)<br>CON: n=50 (m=32.4 y)                                                                   | Individual                                                   | PST-Drug with Psychosocial Counselling | Wait-list       | 6 months                     | Non random   | High                 | <ul style="list-style-type: none"> <li>• PTSD</li> <li>• Anxiety</li> <li>• Forgiveness</li> <li>• Outgroup Blame</li> </ul>    |
| Nakimuli-Mpungu (2013) | Uganda<br>Armed conflict       | Witnesses of war;<br>Female 57.4%<br>Sample size: n=613<br>INT: n=69 (m=47.8 y)<br>CON: n=544 (m=57.9 y)                                                              | Monthly, may be 5 sessions; Group                            | PST-Counselling                        | No intervention | Post 3 month and 4-6 months  | Non random   | High                 | <ul style="list-style-type: none"> <li>• PTSD</li> <li>• Depression</li> <li>• Functional Impairment</li> </ul>                 |
| Neuner (2004)          | Uganda<br>Refugee              | 43 Sudanese refugees<br>Female 60.46%<br>Sample size: n =43<br>INT 1 (NET): n =17 (m=31.9 y)<br>INT 2(Counselling) n= 14 (m=33.8 y)<br>CON: n=12 (m=34.2 y)           | 4, 90-120 mins, sessions for NET and counselling; Individual | NET and PST-support counselling        | Psychoeducation | Post, 4 months and 12 months | Quasi-RCT    | Low                  | <ul style="list-style-type: none"> <li>• PTSD</li> <li>• Emotional problems</li> <li>• Common Mental Health problems</li> </ul> |
| Neuner (2008)          | Uganda<br>Refugee              | Rwandan and Somali refugees; Female 51.26<br>Sample size: n=277<br>INT 1 (NET): n=111 (m=34.4 y)<br>INT 2 (Counselling): n=111 (m = 35.2 y)<br>CON: n= 55 (m =35.6 y) | 6, 1-2 hr, sessions, two sessions per week; Individual       | NET and PST-Counselling                | No intervention | 3 and 6 months               | RCT          | High                 | <ul style="list-style-type: none"> <li>• PTSD</li> </ul>                                                                        |

| Study              | Setting                 | Population                                                                                                                                         | Format and duration                                          | Intervention                                              | Control             | Follow ups        | Study design | Overall risk of bias | Outcomes                                                                                                                                                             |
|--------------------|-------------------------|----------------------------------------------------------------------------------------------------------------------------------------------------|--------------------------------------------------------------|-----------------------------------------------------------|---------------------|-------------------|--------------|----------------------|----------------------------------------------------------------------------------------------------------------------------------------------------------------------|
| Oflaz (2008)       | Turkey Earthquake       | Earthquake survivors; Female 62.7%<br>Sample size: n=51<br>INT 1 (Psych Ed + Med): n=21<br>INT 2 (Psych Ed alone): n=14<br>INT 3 (Med alone): n=16 | 6 sessions weekly, 60-90 mins (6 sessions total); Individual | Psycho education only and Psychoeducation with meditation | TAU                 | Post treatment    | Non random   | High                 | <ul style="list-style-type: none"> <li>• PTSD</li> <li>• Depression</li> <li>• Fear and avoidance</li> <li>• Coping</li> </ul>                                       |
| Rahman (2016)      | Pakistan Armed Conflict | Witnesses of war; Female 78.9%<br>Sample size: n=346<br>INT: n=172 (m=32.7 y)<br>CON: n=174 (m=33.4 y)                                             | Weekly, for 5 weeks; Individual                              | CBT                                                       | Active Intervention | Post 3 months     | RCT          | Low                  | <ul style="list-style-type: none"> <li>• PTSD</li> <li>• Depression</li> <li>• Functional Impairment</li> <li>• Anxiety</li> <li>• Psychological Distress</li> </ul> |
| Scholte (2011)     | Rwanda Genocide         | Survivors of mass violence; Female 54%<br>Sample size: n=200<br>INT: n=100 (m=34.9 y)<br>CON: n=100 (m=38.5 y)                                     | 3hr sessions, weekly for 15 weeks; Group                     | PST-Sociotherapy                                          | No intervention     | Post and 8 months | Non random   | High                 | <ul style="list-style-type: none"> <li>• Common Mental Health problems</li> </ul>                                                                                    |
| Sonderegger (2011) | Uganda Refugee          | War-affected adults;                                                                                                                               | 13x 2hr sessions divided into 2 distinct phases; Group       | CBT                                                       | Wait-list           | Post and 3 months | Non random   | High                 | <ul style="list-style-type: none"> <li>• Depression</li> <li>• Conduct Problems</li> <li>• Anxiety</li> </ul>                                                        |



| Study              | Setting                               | Population                                                                                                                           | Format and duration                                                                   | Intervention                                                                              | Control            | Follow ups   | Study design  | Overall risk of bias | Outcomes                                                                                                                                                         |
|--------------------|---------------------------------------|--------------------------------------------------------------------------------------------------------------------------------------|---------------------------------------------------------------------------------------|-------------------------------------------------------------------------------------------|--------------------|--------------|---------------|----------------------|------------------------------------------------------------------------------------------------------------------------------------------------------------------|
|                    |                                       |                                                                                                                                      |                                                                                       |                                                                                           |                    |              |               |                      | <ul style="list-style-type: none"> <li>• Prosocial behaviour</li> </ul>                                                                                          |
| Steinert (2017)    | Cambodia                              | War-affected adults;<br>Females 60.7%<br>Sample size: n= 84<br>INT: n=52 (m=27.0 y)<br>CON: n=32 (m=28.3 y)                          | 5 weeks;<br>Individual                                                                | PST-ROTATE                                                                                | Wait-list          | Post         | RCT           | Moderate             | <ul style="list-style-type: none"> <li>• PTSD</li> <li>• Depression</li> <li>• Functional Impairment</li> <li>• Emotional Problems</li> <li>• Anxiety</li> </ul> |
| Tellies (2010)     | India<br>Flood                        | Males<br>Sample size: n= 22<br>INT: n =11 (m = 32.1 y)<br>CON: n =11 (m= 30.8 y)                                                     | 7, 1 hr, sessions<br>for one-week<br>yoga; Individual                                 | PST-Yoga                                                                                  | Wait-list          | Post         | RCT           | Low                  | <ul style="list-style-type: none"> <li>• Anxiety</li> <li>• Emotional problems</li> <li>• Fear and avoidance</li> </ul>                                          |
| Vijayakumar (2008) | Asian<br>Tsunami<br>2004<br>(Chennai) | Tsunami survivors who<br>lost family members;<br>Females 51.0%<br>Sample size: n=102<br>INT: n=45 (m=38.6 y)<br>CON: n=57 (m=37.9 y) | A monthly home<br>visit for on<br>average duration<br>of 60-90 minutes;<br>individual | PST-Counselling                                                                           | No<br>intervention | 12<br>months | Non<br>random | High                 | <ul style="list-style-type: none"> <li>• PTSD</li> <li>• Depression</li> <li>• Common<br/>Mental<br/>Health<br/>problems</li> <li>• Well-being</li> </ul>        |
| Weiss (2015)       | Iraq<br>Torture                       | Survivors of torture and<br>militant attacks;<br>Females 30.9%<br>Sample size: n=149<br>INT: n=99 (m=41.6 y)<br>CON: n=50 (m=45.2y)  | CBT- 12 sessions,<br>weekly<br>CPT- 8-12x 50-<br>60min sessions,<br>weekly; Group     | CBT-<br>Transdiagnostic<br>intervention and<br>CBT-<br>Cognitive<br>Processing<br>Therapy | Wait-list          | 3<br>months  | RCT           | Low                  | <ul style="list-style-type: none"> <li>• PTSD</li> <li>• Depression</li> <li>• Functional<br/>Impairment</li> <li>• Anxiety</li> </ul>                           |

| Study          | Setting                     | Population                                                                                                                                                       | Format and duration                                                                                                  | Intervention                                                                             | Control   | Follow ups | Study design | Overall risk of bias | Outcomes                                                                                                                                                                               |
|----------------|-----------------------------|------------------------------------------------------------------------------------------------------------------------------------------------------------------|----------------------------------------------------------------------------------------------------------------------|------------------------------------------------------------------------------------------|-----------|------------|--------------|----------------------|----------------------------------------------------------------------------------------------------------------------------------------------------------------------------------------|
| Yeomans (2010) | Burundi<br>Armed conflict   | Participants; mean age = 38.6 y; Women 44.4%<br>Sample size: n =124<br>INT 1(Workshop with psychoeducation): n= 41<br>INT 2 (Workshop only): n= 41<br>CON: n= 42 | 3 day workshops and one-day follow up one month later;<br>Group                                                      | PST- Reconciliation workshops with Psychoeducation and PST- Reconciliation workshop only | Wait-list | 2 weeks    | RCT          | Low                  | <ul style="list-style-type: none"> <li>• PTSD</li> <li>• Emotional problems</li> </ul>                                                                                                 |
| Zang (2013)    | China<br>Earthquake in 2008 | Earthquake survivors; mean-age 55.7 y; women 77%<br>Sample size: n =22<br>INT: n =11<br>CON: n=11                                                                | 4 sessions, 60-90 mins for 2 weeks;<br>Individual                                                                    | NET                                                                                      | Wait-list | Post       | RCT          | Low                  | <ul style="list-style-type: none"> <li>• PTSD</li> <li>• Depression</li> <li>• Anxiety</li> <li>• Common Mental Health problems</li> <li>• Social support</li> <li>• Coping</li> </ul> |
| Zang (2014)    | China<br>Earthquake         | Earthquake survivors: mean age = 53.63 y; Women 90%<br>Sample size: n=30<br>INT 1(NET): n=10<br>INT 2 (NET-short): n = 10<br>CON: n= 10                          | NET 4 sessions or more, 60-90 mins over two weeks;<br>NET-short; 3 or more 60-120 sessions over one week; Individual | NET and NET-Short version                                                                | Wait-list | Post       | RCT          | Moderate             | <ul style="list-style-type: none"> <li>• PTSD</li> <li>• Depression</li> <li>• Anxiety</li> <li>• Common Mental health problems</li> <li>• Social support</li> <li>• Coping</li> </ul> |

PST= Psychotherapy; EMDR = eye movement desensitization and reprocessing; IPT = Interpersonal Psychotherapy; ROTATE = resource-oriented trauma therapy with EMDR; CBT = Cognitive Behavioural Therapy; NET =Narrative Exposure Therapy; INT = Intervention group; CON =control group; PTSD =Post Traumatic Stress Disorder; RCT= Randomised Controlled Trials; PTSD = Post Traumatic Stress Disorder; TAU = Treatment as usual
